# Supplementary material
Source: Springer Nature journal article supplement (https://www.springermedizin.de/resource/supplementary/12885_2006_533_MOESM7_ESM.pdf/9469698)

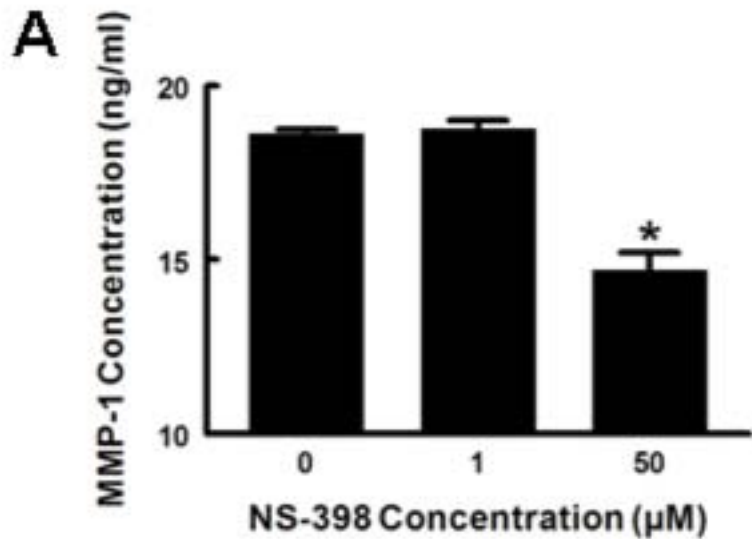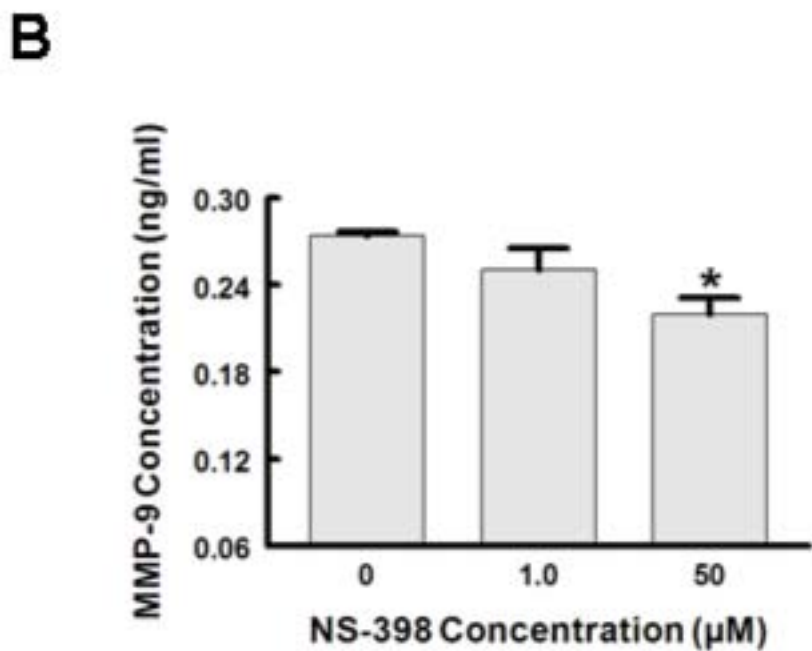

Supplement: MOESM7 [file 9469698]
